# Supplementary material for: Application of Seaweed Generates Changes in the Substrate and Stimulates the Growth of Tomato Plants
Source: MDPI journal article supplement (doi:10.3390/plants12071520), 2023-03-31
Supplement: s1 [file s1]

**Table S1.** Percentage of biomass remaining and N remaining in the decomposed dry biomass and N released to the substrate.

| Time (days) | Remaining dry mass | Remaining N   | Mineralized N |
|-------------|--------------------|---------------|---------------|
| 0           | 100± 0.00a         | 100± 0.00a    | 0± 0.00f      |
| 7           | 39.54± 1.10b       | 79.85± 1.03b  | 20.14± 2.32e  |
| 14          | 27.38± 2.21c       | 74.01± 1.01b  | 25.98± 1.21d  |
| 21          | 20.30± 2.21d       | 65.79± 2.11c  | 34.2± 1.012c  |
| 28          | 19.24± 3.41d       | 54.98± 2.101d | 45.01± 2.01b  |
| 35          | 18.57± 3.21d       | 54.46± 3.01d  | 45.53± 2.02b  |
| 42          | 10.38± 2.21e       | 29.6± 1.11e   | 70.39± 3.05a  |
| 49          | 8.59± 2.11e        | -             | -             |
| 56          | 6.6± 2.016e        | -             | -             |

nd = not determined. Different letters (a–e) within the rows indicate significant differences of each treatment in comparison to the control (untreated substrate), based on the Holm–Sidak means comparison test ( $p < 0.05$ ).

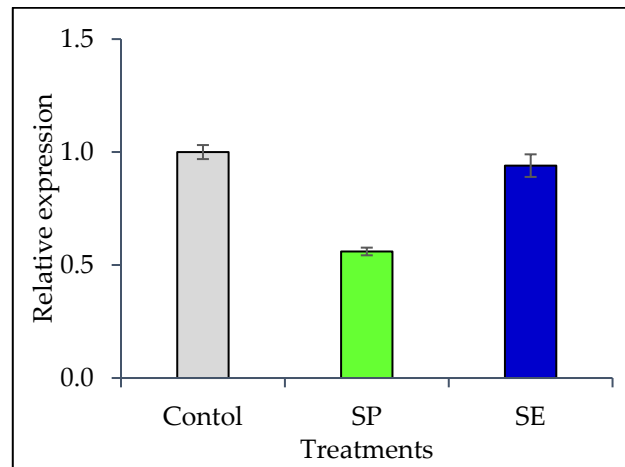

**Figure S1.** Expression analysis of the SIHB7 gene related to the response to salinity stress in tomato. Transcript levels analyzed in pooled leaves of three 45-day-old tomato plants treated with seaweed powder (SP) or seaweed extract (SE) from *Ulva ohnoi*. Values represent mean ± standard deviation (n=3).
